# Supplementary material
Source: PubMed Central journal article supplement (PMC7330820)
Supplement: jama-324-510-s001.pdf [file jama-324-510-s001.pdf]

## Supplementary Online Content

Woolf SH, Chapman DA, Sabo RT, Weinberger DM, Hill L. Excess deaths from COVID-19 and other causes, March-April 2020. JAMA. Published online July 1, 2020.  
doi:10.1001/jama.2020.11787

**eTable.** Grouped cause data reported by Centers for Disease Control and Prevention

This supplementary material has been provided by the authors to give readers additional information about their work.

**Causes of death:** Causes of death examined in this study were limited to those for which provisional death data were available during 2020 and the first weeks of the novel coronavirus disease 2019 (COVID-19). The Centers for Disease Control and Prevention provided data for 12 grouped causes (eTable).<sup>1,2</sup> Deaths from external causes were calculated as total all-cause deaths minus deaths from natural causes.

| <b>eTable. Grouped cause data reported by Centers for Disease Control and Prevention</b> |                                                                                                                                             |
|------------------------------------------------------------------------------------------|---------------------------------------------------------------------------------------------------------------------------------------------|
| <b>Causes of death</b>                                                                   | <b>Definitions</b>                                                                                                                          |
| Natural causes <sup>3</sup>                                                              | Deaths from medical causes, not resulting from external causes (e.g., accident, suicide, homicide) or from causes pending or not determined |
| External causes                                                                          | Deaths from accidents, suicide, homicide, and causes pending or not determined                                                              |
| <b><i>International Classification of Disease 10 (ICD-10) codes</i></b>                  |                                                                                                                                             |
| Septicemia                                                                               | A40-A41                                                                                                                                     |
| Malignant neoplasms                                                                      | C00-C97                                                                                                                                     |
| Diabetes mellitus*                                                                       | E10-E14                                                                                                                                     |
| Alzheimer's disease*                                                                     | G30                                                                                                                                         |
| Diseases of the heart*                                                                   | I00-I09,I11,I13,I20-I51                                                                                                                     |
| Cerebrovascular diseases*                                                                | I60-I69                                                                                                                                     |
| Influenza and pneumonia                                                                  | J10-J18                                                                                                                                     |
| Chronic lower respiratory diseases                                                       | J40-J47                                                                                                                                     |
| Other diseases of the respiratory system                                                 | J00-J06,J30-J39,J67,J70-J98                                                                                                                 |
| Nephritis, nephrotic syndrome, and nephrosis                                             | N00-N07,N17-N19,N25-N27                                                                                                                     |
| Symptoms, signs and abnormal clinical and laboratory findings, not elsewhere classified  | R00-R99                                                                                                                                     |
| COVID-19*                                                                                | U07.1                                                                                                                                       |
| * Results reported in Research Letter. Results for all 14 causes available upon request. |                                                                                                                                             |

**Modeling:** A hierarchical Poisson regression model was fitted to weekly death data from January 2014 through February 2020. All model terms (intercept and slopes) were fit hierarchically, with an overall fixed effect for each parameter and a random effect that allowed each parameter to vary by state. The Bayesian Information Criterion (BIC) was compared for 30 alternative sets of covariates that adjusted for time using calendar year (January-December), epidemiological year (July-June), or a linear trend and compared different combinations of harmonics with varying periodicities (4, 6, 12, and 24 months). The 5 models with the lowest BIC produced excess death estimates ranging from 73,524 to 88,991 (mean = 85,217; median = 88,189). The best-fitting model (lowest BIC)—which used calendar year and periods of 6, 12, and 24 months—estimated 87,001 excess deaths and was selected for this study. Details available on request.

## REFERENCES

---

<sup>1</sup> Weekly counts of deaths by state and select causes, 2014-2018. National Center for Health Statistics website. Updated June 5, 2020. Accessed June 10, 2020. <https://data.cdc.gov/NCHS/Weekly-Counts-of-Deaths-by-State-and-Select-Causes/3yf8-kanr>

<sup>2</sup> Weekly counts of deaths by state and select causes, 2019-2020. National Center for Health Statistics website. Updated June 10, 2020. Accessed June 10, 2020. <https://data.cdc.gov/NCHS/Weekly-Counts-of-Deaths-by-State-and-Select-Causes/muzy-jte6>

<sup>3</sup> National Center for Health Statistics. *Physicians' Handbook on Medical Certification of Death*. Publication No. (PHS) 2003-1108. Washington, DC: US Department of Health and Human Services, 2003.
